# Supplementary material for: Simulated microgravity improves maturation of cardiomyocytes derived from human induced pluripotent stem cells
Source: Springer Nature journal article supplement (doi:10.1038/s41598-024-52453-1), 2024-01-26
Supplement: MOESM1 [file 41598_2024_52453_MOESM1_ESM.pdf]

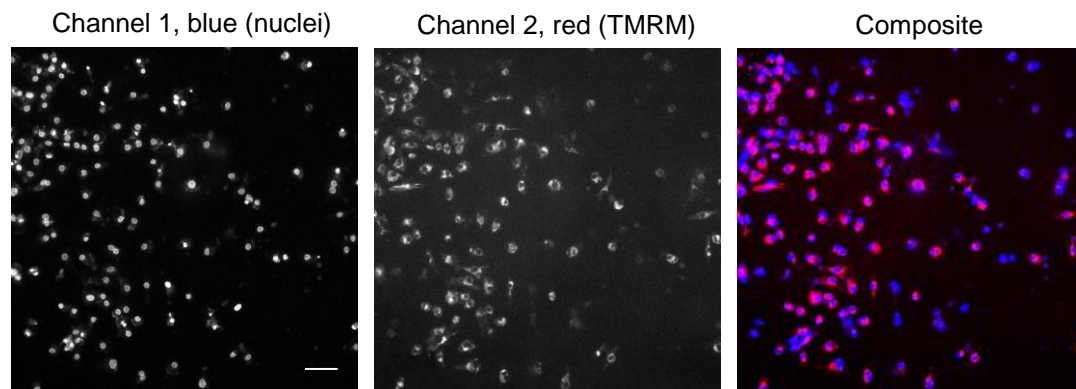

- Masking
- The software identifies
- Nuclear regions (purple; selected objects)
  - Cytoplasmic region (red ring; purple nuclear areas excluded)

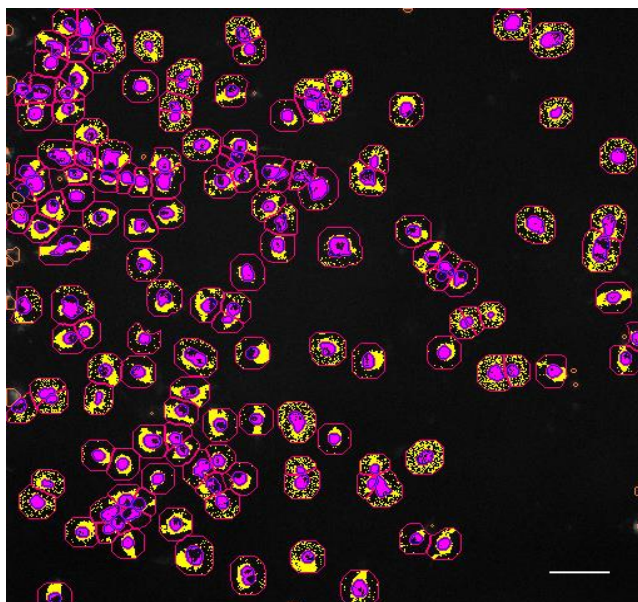

- High-content imaging outcomes
- The software calculates
- Mean fluorescence intensity of TMRM within the cytoplasmic regions

Note: TMRM signals are indicated as yellow

**Supplemental Figure 1. Quantitative analysis of high-content imaging of TMRM** (Related to Figure 5A-B). Representative images of two channels for nuclei (blue) and cytoplasmic TMRM signals (red) using high-content ArrayScan imaging. The images were analyzed with a mask modifier for Hoechst-stained nuclei and TMRM signals restricted to cytoplasmic area. Scale bar 100  $\mu\text{m}$ .

### Supplemental Table 1. Maturation medium

| Component                           | Vendor            | Cat#         | Stock concentration | Final concentration | Volume for 100 mL |
|-------------------------------------|-------------------|--------------|---------------------|---------------------|-------------------|
| DMEM                                | Gibco             | 11995-065    | 100%                | 87%                 | 87 ml             |
| Heat-inactivated fetal bovine serum | VWR               | SH30396.03HI | 100%                | 10%                 | 10 ml             |
| Glutamax-I                          | Fisher Scientific | 35050079     | 100 x               | 1%                  | 1 ml              |
| Non-essential amino acids           | Fisher Scientific | 11140050     | 100 x               | 1%                  | 1 ml              |
| Oleic acid                          | Sigma Aldrich     | O3008-5 ML   | 400 mM              | 100 µM              | 25 µl             |
| Palmitic acid                       | Sigma Aldrich     | P5585-25 G   | 500 mM              | 50 µM               | 10 µl             |
| Penicillin-Streptomycin             | Gibco             | 15140-122    | 100 x               | 1%                  | 1 ml              |

### Supplemental Table 2. Primers for qPCR of mtDNA/nDNA ratio

| Genes | Description                         | Sequence                                                                       | References   |
|-------|-------------------------------------|--------------------------------------------------------------------------------|--------------|
| DHA   | succinate dehydrogenase subunit A   | Forward: <i>TCTCCAGTGGCCAACAGTGTT</i><br>Reverse: <i>GCCCTCTTGTTCCCAT CAAC</i> | <sup>1</sup> |
| LPL   | lipoprotein lipase                  | Forward: <i>CGAGTCGTCTTTCTCCTGAT</i><br>Reverse: <i>TTCTGGATTCCAATGCTTCGA</i>  | <sup>2</sup> |
| ND    | NADH dehydrogenase subunit          | F Forward: <i>CCCTAAAACCCGCCACATCT</i><br>Reverse: <i>GCGATGGTGAGAGCTAAGGT</i> | <sup>1</sup> |
| mtCO2 | mitochondrial cytochrome oxidase II | Forward: <i>CGATCCCTCCCTTAC</i><br>Reverse: <i>GAGAGGGGAGAGCAAT</i>            | <sup>3</sup> |

### References

- 1 Chong, J. J. *et al.* Human embryonic-stem-cell-derived cardiomyocytes regenerate non-human primate hearts. *Nature* **510**, 273-277, doi:10.1038/nature13233 (2014).
- 2 Gonzalez-Halphen, D., Ghelli, A., Iommarini, L., Carelli, V. & Esposti, M. D. Mitochondrial complex I and cell death: a semi-automatic shotgun model. *Cell Death Dis* **2**, e222, doi:10.1038/cddis.2011.107 (2011).
- 3 Cinsley Gentillon 1, D. L., Meixue Duan 2, Wen-Mei Yu *et AL.* . Targeting HIF-1α in combination with PPARα activation and postnatal factors promotes the metabolic maturation of human induced pluripotent stem cell-derived cardiomyocytes. *J Mol Cell Cardio*, J Mol Cell Cardio (2019).
